# Supplementary material for: An Instruction on the In Vivo Shell-Less Chorioallantoic Membrane 3-Dimensional Tumor Spheroid Model
Source: PubMed Central journal article supplement — Cytotechnology. 2010 May 25;62(3):279–83. doi: 10.1007/s10616-010-9279-8 (PMC2932906; doi:10.1007/s10616-010-9279-8), 2010-05-25
Supplement: 10616_2010_9279_MOESM1_ESM.pdf [file 10616_2010_9279_MOESM1_ESM.pdf]

**ESM\_1** Difference between shell and shell-less CAM model configurations

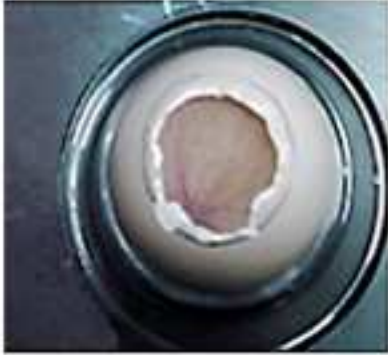

**a.** Shell model has small aperture with a concave CAM surface.

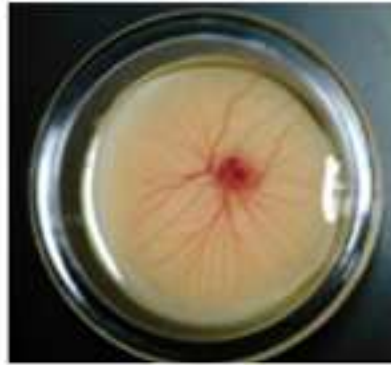

**b.** Shell-less model has a large aperture with flat CAM surface.
