# Supplementary material for: An Instruction on the In Vivo Shell-Less Chorioallantoic Membrane 3-Dimensional Tumor Spheroid Model
Source: PubMed Central journal article supplement — Cytotechnology. 2010 May 25;62(3):279–83. doi: 10.1007/s10616-010-9279-8 (PMC2932906; doi:10.1007/s10616-010-9279-8), 2010-05-25

**ESM\_2** Histological cross-section (optical microscopic image) through the center of a spheroid  $\sim 1000 \mu\text{m}$  in diameter stained with eosin and hematoxylin, showing the viable rim of cells and the necrotic center. *Superimposed* is a diagram illustrating the relative distributions of proliferating (*purple, P*) and quiescent (*orange, Q*) cells and central necrosis (*yellow, N*) in the spheroid

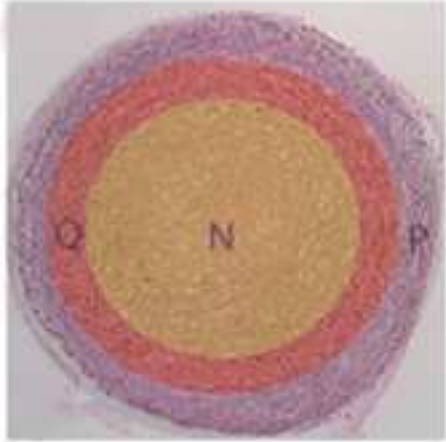

Supplement: 10616_2010_9279_MOESM2_ESM.pdf [file 10616_2010_9279_MOESM2_ESM.pdf]
