# Supplementary material for: An Instruction on the In Vivo Shell-Less Chorioallantoic Membrane 3-Dimensional Tumor Spheroid Model
Source: PubMed Central journal article supplement — Cytotechnology. 2010 May 25;62(3):279–83. doi: 10.1007/s10616-010-9279-8 (PMC2932906; doi:10.1007/s10616-010-9279-8), 2010-05-25

**ESM\_4** Illustration of the tumor implantation technique: 1. implantation location; 2. scratching of epithelium; 3. blood smear; 4. cleaning the severed area; 5. placement of the tumor spheroid onto the implantation site; 7. engulfment of the tumor spheroid (1mm spheroid)

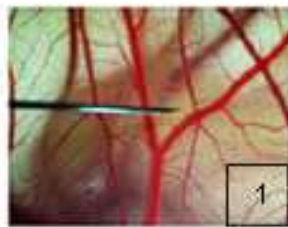

**1.** Choose implantation site adjacent to a large vessel on the CAM.

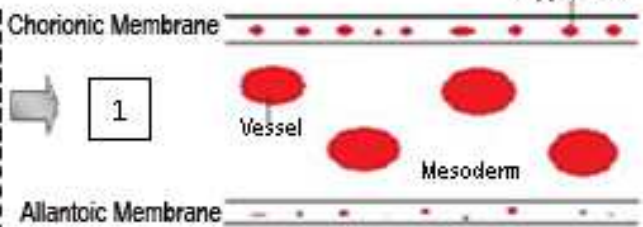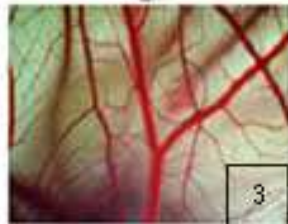

**2.** With a 30G hypodermic needle attached to a 1cc syringe, scratch away surface of CAM with the needle's bevel.

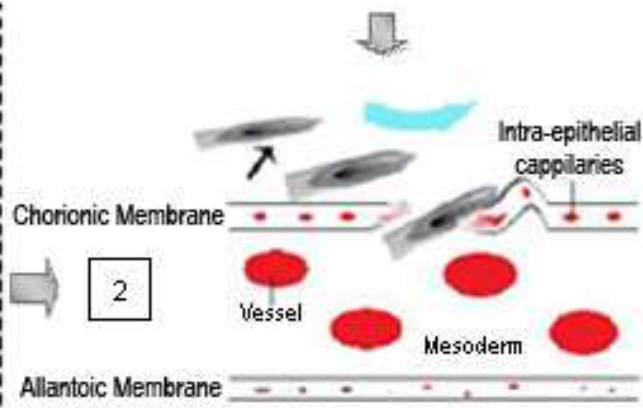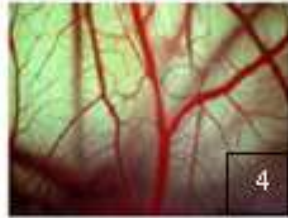

**3.** A blood smear develops  
**4.** Clean the area by sucking the blood and debris.

**2**

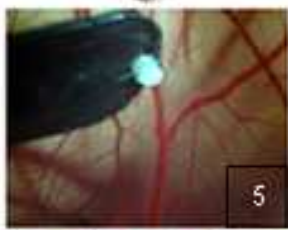

**5.** Using a spatula, drop the tumor spheroid into the severed area.

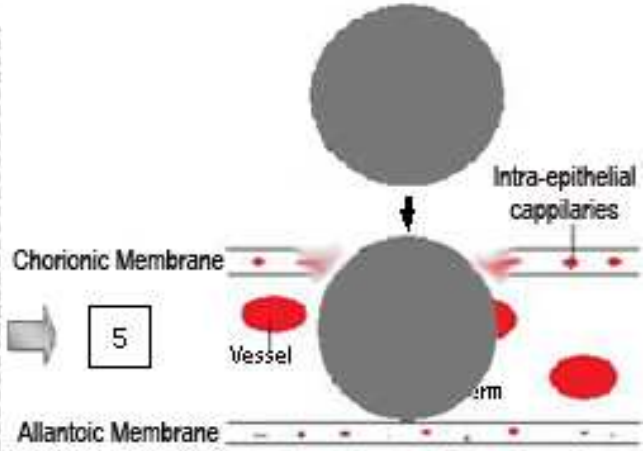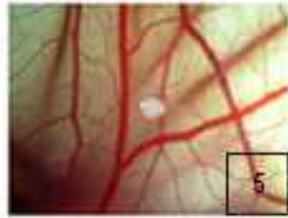

**6.** Cover the dish with a breathable sheet, and return embryo to the incubator.

**5**

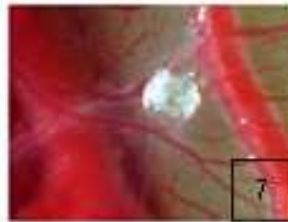

**7.** After 24 hrs of incubation, tumor spheroid rests inside the CAM mesoderm, and the severed epithelium has healed over the spheroid.

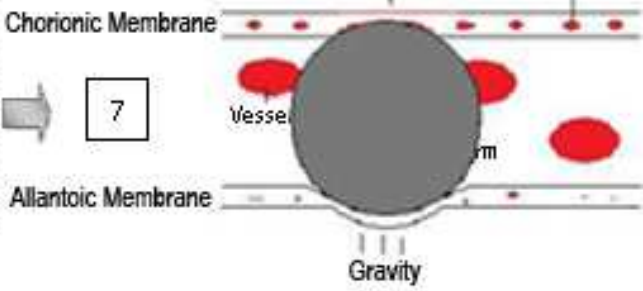

Supplement: 10616_2010_9279_MOESM4_ESM.pdf [file 10616_2010_9279_MOESM4_ESM.pdf]
